# Supplementary material for: Mechanical, thermal transport, electronic and photocatalytic properties of penta-PdPS, -PdPSe and -PdPTe monolayers explored by first-principles calculations
Source: Royal Society of Chemistry journal article supplement (doi:10.1039/d1tc05297g), 2021-12-06
Supplement: d1tc05297g1.pdf [file d1tc05297g1.pdf]

## Supplementary Information

# Mechanical, thermal transport, electronic and photocatalytic properties of penta-PdPS, -PdPSe and -PdPTe monolayers explored by first-principles calculations

Bohayra Mortazavi<sup>a,b,\*</sup>, Masoud Shahrokhi<sup>c</sup>, Xiaoying Zhuang<sup>a,d</sup>, Timon Rabczuk<sup>d</sup> and Alexander V. Shapeev<sup>e</sup>

<sup>a</sup>*Chair of Computational Science and Simulation Technology, Department of Mathematics and Physics, Leibniz Universität Hannover, Appelstraße 11, 30167 Hannover, Germany.*

<sup>b</sup>*Cluster of Excellence PhoenixD (Photonics, Optics, and Engineering–Innovation Across Disciplines), Gottfried Wilhelm Leibniz Universität Hannover, Hannover, Germany.*

<sup>c</sup>*Young Researchers Club, Kermanshah Branch, Islamic Azad University, Kermanshah, Iran.*

<sup>d</sup>*College of Civil Engineering, Department of Geotechnical Engineering, Tongji University, 1239 Siping Road Shanghai, China.*

<sup>e</sup>*Skolkovo Institute of Science and Technology, Skolkovo Innovation Center, Bolshoy Bulvar, 30, Moscow, 143026, Russia.*

\*E-mail: [bohayra.mortazavi@gmail.com](mailto:bohayra.mortazavi@gmail.com)

## 1- Computational details for optical properties

In the random phase approximation, the imaginary part of the interband dielectric permittivity is given by [1]:

$$\text{Im} \varepsilon_{\alpha\beta}(\omega) = \frac{4\pi^2 e^2}{\Omega} \lim_{q \rightarrow 0} \frac{1}{|q|^2} \sum_{c,v,k} 2w_k \delta(\varepsilon_{ck} - \varepsilon_{vk} - \omega) \times \langle u_{ck+e_\alpha q} | u_{vk} \rangle \langle u_{ck+e_\beta q} | u_{vk} \rangle^* \quad (1)$$

where  $q$  is the Bloch vector of the incident wave,  $w_k$  is the k-point weight and the band indices  $c$  and  $v$  are restricted to the conduction and the valence band states, respectively. By using the  $\text{Im} \varepsilon_{\alpha\beta}(\omega)$ , one can determine the corresponding real part via the Kramers–Kronig relation:

$$\text{Re} \varepsilon_{\alpha\beta}(\omega) = 1 + \frac{2}{\pi} P \int_0^\infty \frac{\omega' \text{Im} \varepsilon_{\alpha\beta}(\omega')}{(\omega')^2 - \omega^2 + i\eta} d\omega' \quad (2)$$

where  $P$  denotes the principle value and  $\eta$  is the complex shift. The adsorption coefficient determined as:

$$a_{\alpha\beta}(\omega) = \frac{2\omega k_{\alpha\beta}(\omega)}{c} \quad (3)$$

where  $k_{\alpha\beta}$  is imaginary part of the complex refractive index and  $c$  is the speed of light in vacuum, known as the extinction index, given by the following relation:

$$k_{\alpha\beta}(\omega) = \sqrt{\frac{|\varepsilon_{\alpha\beta}(\omega) - \text{Re} \varepsilon_{\alpha\beta}(\omega)|}{2}} \quad (4)$$

The reflectivity is described by:

$$R_{ij}(\omega) = \frac{(n-1)^2 + k^2}{(n+1)^2 + k^2} \quad (5)$$

where  $n$  and  $k$  are real and imaginary parts of the complex refractive index, which are known as the refractive index and the extinction index, respectively.

## 2- Atomic structures in VASP POSCAR format

### PdPS

```
1.0000000000000000
  5.6901255339477377    0.0000000000000000    0.0000000000000000
  0.0000000000000000    5.7225312188106354    0.0003146491320652
  0.0000000000000000    0.0010996412387334    20.0000999999999998
  P      Pd      S
  4      4      4
Direct
0.8688536317072248    0.7195983874681176    0.4273073849567766
0.8688536317072248    0.7804016125841642    0.3166892096932230
0.1311463832687352    0.2195983874506879    0.4273073849567766
0.1311463832687352    0.2804016125667417    0.3166892096932230
0.7502624153310151    0.1594204594204669    0.2963150729743518
0.7502624153310151    0.3405795405969556    0.4476814773256521
0.2497376145333305    0.8405795106398131    0.4476814773256521
0.2497376145333305    0.6594204892382010    0.2963150729743518
0.3627426258482345    0.4547204925221067    0.4767041966139445
0.6372574040161112    0.9547204925395363    0.4767041966139445
0.3627426258482345    0.0452794961677156    0.2672923758860506
0.6372574040161112    0.5452795073384706    0.2672923758860506
```

### PdPSe

```
1.0000000000000000
  5.8420404764721852    0.0000057313269604    0.0003158045741170
  0.0000058325399377    5.8988560743563569    0.0060438911986157
  0.0010816316632133    0.0205103252828701    20.0000000000000000
  P      Pd      Se
  4      4      4
Direct
0.8619892623136423    0.6986709339369952    0.4265941993766305
0.8620441335768732    0.7692779437197856    0.3174008954809864
0.1104022293499014    0.1986718385472415    0.4265956991690203
0.1104571006131323    0.2692788483300319    0.3174023952733691
0.7434902286535561    0.1378005584985402    0.2969226814593924
0.7434162630365933    0.3301508978534855    0.4470718109314689
0.2289561487513652    0.8301491947546111    0.4470738688406115
0.2290301143683351    0.6377989132587416    0.2969247393685350
0.3502700730668451    0.4447438396034684    0.4822610968603911
0.6220782373035973    0.9447450805156308    0.4822575114511949
0.3503681401013310    0.0232046907868479    0.2617390610488002
0.6221763043380832    0.5232059424948758    0.2617354756396040
```

## PdPTe

1.0000000000000000

|                    |                    |                     |
|--------------------|--------------------|---------------------|
| 6.0665874203144519 | 0.0000040488968616 | 0.0006064123053049  |
| 0.0000044497697522 | 6.1745853926294592 | 0.0191226716802628  |
| 0.0020030579362554 | 0.0620730110846848 | 19.9852912972216785 |

| P | Pd | Te |
|---|----|----|
| 4 | 4  | 4  |

Direct

|                    |                    |                    |
|--------------------|--------------------|--------------------|
| 0.8712532604300378 | 0.6950797370968900 | 0.4260445271288731 |
| 0.8713468696433040 | 0.7728690940120799 | 0.3179497652499919 |
| 0.1010994932834706 | 0.1950806882549401 | 0.4260468294000077 |
| 0.1011931024967367 | 0.2728700451701371 | 0.3179520675211265 |
| 0.7506656043089066 | 0.1289263443649986 | 0.2978488058354998 |
| 0.7505393255456383 | 0.3390255153080517 | 0.4461440139703896 |
| 0.2217807730960217 | 0.8390234088881527 | 0.4461477444645041 |
| 0.2219070518592900 | 0.6289242958041754 | 0.2978525363296143 |
| 0.3520569605185457 | 0.4559744257703287 | 0.4873458164709845 |
| 0.6202137064640567 | 0.9559755953210143 | 0.4873417645312870 |
| 0.3522326709408716 | 0.0119741759814644 | 0.2566548079687081 |
| 0.6203894168863826 | 0.5119753563280156 | 0.2566507560290106 |
